# Supplementary material
Source: PubMed Central journal article supplement (PMC4341482)
Supplement: ASN.2014030228_ASN2014030228SupplementaryData.pdf [file ASN.2014030228_ASN2014030228SupplementaryData.pdf]

**Association of early kidney allograft failure with preformed IgA antibodies to B2 glycoprotein I.**

**SUPPLEMENTARY MATERIAL**

**Supplementary Figure 1.**

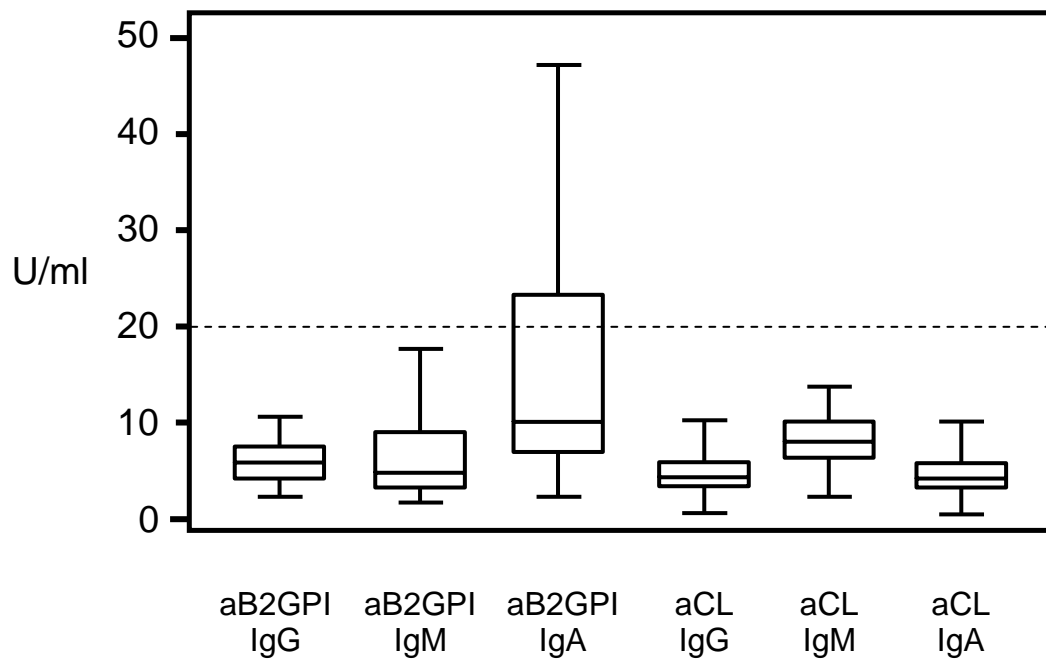

**Supplementary Figure 1.**

Pretransplant levels of anti-phospholipid antibodies. Cutoff is indicated by a dotted line.

aB2GPI: Antibodies anti  $\beta_2$  Glycoprotein I. aCL: Antibodies anti-cardiolipin.

**Supplementary Table 1.**

Characteristics of patients included in follow-up versus those excluded. Non-significant differences were observed. CKD: Chronic Kidney Disease. SE: Standard Error of the mean.

| CONDITION                   | Follow-Up<br>(N=269) |         | Excluded (N=60) |         | p value |
|-----------------------------|----------------------|---------|-----------------|---------|---------|
|                             | N / mean             | % / SE  | N / mean        | % / SE. |         |
| Age (years)                 | 50.5                 | ±0.9    | 54.7            | ±2.2    | 0.057   |
| Donor age (years)           | 46.8                 | ±1.3    | 50.4            | ±2.7    | 0.286   |
| Weight (kg)                 | 66.9                 | ±0.9    | 65.4            | ±2.4    | 0.488   |
| Height (cm)                 | 164.6                | ±0.6    | 164.3           | ±1.44   | 0.846   |
| Sex (women)                 | 124                  | (46.1%) | 25              | (41.7%) | 0.631   |
| Peritoneal dialysis         | 38                   | (14.1%) | 5               | (8.3%)  | 0.321   |
| <b>Causes CKD</b>           |                      |         |                 |         |         |
| Chronic glomerulonephritis  | 69                   | (25.7%) | 16              | (26.7%) | 1.000   |
| Interstitial kidney disease | 53                   | (19.7%) | 13              | (21.7%) | 0.869   |
| Nephroangiosclerosis        | 26                   | (9.7%)  | 2               | (3.3%)  | 0.182   |
| Polycystic kidney disease   | 44                   | (16.4%) | 11              | (18.3%) | 0.857   |
| Diabetes                    | 24                   | (8.9%)  | 6               | (10.0%) | 0.989   |
| Unexplained                 | 25                   | (9.3%)  | 6               | (10.0%) | 0.940   |
| Other                       | 28                   | (10.4%) | 6               | (10.0%) | 0.888   |
| Graft loss in follow-up     | 80                   | (29.7%) | 17              | (28.3%) | 0.953   |
| Death in follow-up          | 47                   | (17.5%) | 13              | (21.7%) | 0.565   |

## Supplementary Table 2

Early graft loss associated factors. SE: Standard Error of the mean.

| CONDITION                            | Early graft loss<br>First six months,<br>(N=13) |         | Patients with stable<br>graft at 6 months<br>(N=256) |         | p value |
|--------------------------------------|-------------------------------------------------|---------|------------------------------------------------------|---------|---------|
|                                      | N / mean                                        | % / SE  | N / mean                                             | % / SE  |         |
| Sex (women)                          | 5                                               | (38.5%) | 119                                                  | (46.5%) | 0.779   |
| Recipient Age                        | 60.4                                            | ±2.7    | 50.1                                                 | ±0.9    | 0.008   |
| Anti B2GPI IgA +                     | 10                                              | (76.9%) | 79                                                   | (30.8%) | 0.002   |
| Dislipidemia                         | 5                                               | (38.5%) | 80                                                   | (31.3%) | 0.810   |
| Previous anti HLA antibodies         | 3                                               | (23.1%) | 61                                                   | (23.8%) | 0.786   |
| Diabetes Mellitus                    | 2                                               | (15.4%) | 28                                                   | (10.9%) | 0.964   |
| Arterial hypertension                | 11                                              | (84.6%) | 197                                                  | (77.0%) | 0.761   |
| Delayed graft function               | 7                                               | (53.8%) | 44                                                   | (17.2%) | 0.003   |
| Previous transplant                  | 1                                               | (7.7%)  | 36                                                   | (14.1%) | 1.000   |
| Donor cardiovascular history         | 2                                               | (15.4%) | 30                                                   | (11.7%) | 0.967   |
| Heart failure history                | 1                                               | (7.7%)  | 14                                                   | (5.5%)  | 0.534   |
| Ischemic heart disease - history     | 0                                               | (0%)    | 9                                                    | (3.5%)  | 1.000   |
| Cold Ischemia                        | 23.0                                            | ±0.3    | 20.0                                                 | ±0.9    | 0,039   |
| Warm Ischemia in recipient (minutes) | 31.0                                            | ±1.66   | 31.1                                                 | ±0.42   | 0.968   |
| Double transplant                    | 3                                               | (23,1%) | 19                                                   | (7,4%)  | 0,136   |

**Supplementary Table 3.**

Characteristics of patients on late post-transplant period (after 6 months), Non-significant differences between both groups were observed. CV: Cardiovascular,

| Late post-transplant period (after 6 months) | Group 1                      |         | Group 2                       |         | p value |
|----------------------------------------------|------------------------------|---------|-------------------------------|---------|---------|
|                                              | IgA anti B2GPI positive N=79 |         | IgA anti B2GPI negative N=177 |         |         |
| CONDITION                                    | N                            | %       | N                             | %       |         |
| Acute rejection episodes                     | 5                            | (6.3%)  | 8                             | (4.5%)  | 0.763   |
| Graft loss                                   | 24                           | (30.4%) | 43                            | (24.3%) | 0.385   |
| Nephrectomy                                  | 2                            | (2.5%)  | 6                             | (3.4%)  | 0.981   |
| Patients con CV Events                       | 13                           | (16.5%) | 26                            | (14.7%) | 0.861   |
| Death                                        | 14                           | (17.7%) | 28                            | (15.8%) | 0.353   |
| <b>Causes of graft loss</b>                  |                              |         |                               |         |         |
| Acute rejection                              | 1                            | (4.2%)  | 0                             | (0%)    | 0.767   |
| Uropathy                                     | 0                            | (0%)    | 1                             | (2.3%)  | 0.767   |
| Vascular                                     | 0                            | (0%)    | 1                             | (2.3%)  | 0.767   |
| Patient death                                | 13                           | (54.2%) | 26                            | (60.5%) | 0.808   |
| Chronic allograft nephropathy                | 8                            | (33.3%) | 12                            | (27.9%) | 0.852   |
| Graft Thrombosis                             | 1                            | (4.2%)  | 1                             | (2.3%)  | 0.746   |
| Recurrence of disease.                       | 1                            | (4.2%)  | 2                             | (4.7%)  | 0.600   |
